# Supplementary material for: Encapsulated recyclable porous materials: an effective moisture-triggered fragrance release system
Source: Royal Society of Chemistry journal article supplement (doi:10.1039/c3cc41236a), 2013-01-01
Supplement: c3cc41236a.pdf [file c3cc41236a.pdf]

# Encapsulated Recyclable Porous Materials: An Effective Moisture-Triggered Fragrance Release

*Bisera Efremovska,<sup>‡</sup> Haohan Wu,<sup>‡</sup> John Vaughn,<sup>‡</sup> David H. Olson, Jairajh Mattai, Claudio Ortiz, Allen Puchalski, Jing Li,<sup>\*</sup> and Long Pan<sup>\*</sup>*

## SUPPORTING INFORMATION

### Table of Contents

1. General Procedures
2. **Figure S1.** The PXRD patterns of RPM1-Zn and RPM3-Zn before and after adsorption experiments.
3. **Figure S2.** TG profiles of EB and DL desorption from RPM3-Zn.
4. **Tables S1-S3.** GC-MS Results.

## General Procedures

### Powder X-ray diffraction

Powder X-ray diffraction experiment was conducted using a D/M-2200T automated system (Ultima+, Rigaku) with Cu K $\alpha$  radiation ( $\lambda = 1.5406 \text{ \AA}$ ). The PXRD patterns were collected between  $3^\circ$  and  $50^\circ$  ( $2\theta$ ) at a scan rate of 5 deg/min (40 kV, 40 mA).

### Thermogravimetric Analysis (TGA).

The activation temperature of the fragrance bubbler was  $18^\circ\text{C}$ . When loading the RPM with fragrance, the framework was first dried in an oven vacuum at  $135^\circ\text{C}$  overnight. Once the RPM was dried and all moisture eradicated, excess ethyl butyrate was added over a constant flow of nitrogen gas for a period of two hours at a temperature of  $30^\circ\text{C}$ . Once the sample was loaded with the fragrance, it was placed in the TGA and adsorption uptake was measured every thirty minutes. This procedure was repeated for both fragrances.

Using RPM<sub>3</sub>-Zn, the rate of adsorption was measured at  $30^\circ\text{C}$  and variable pressure. The parameters for this experiment were as follows: activation condition is 120 minutes at  $120^\circ\text{C}$ , 200 minutes for each adsorption and desorption – recording weight every minute. The pressures were as follows: 3.2 torr, 5.4 torr, 8.2 torr, and 11.1 torr.

### Headspace GC-MS.

Samples were prepared for GC-MS analysis such that there was 3.5 mg of fragrance compound (either ethyl butyrate or D-limonene). The sample cap was placed on top of the vial, crimped shut, and placed in a water bath at  $37^\circ\text{C}$ . A 1mL aliquot of headspace was taken, by inserting the syringe through the septum to a depth of approximately 5cm, measured from the top of the vial. The instrument used is an Agilent GC/MS Model 6890, 5973 Network Mass Selective Detector with Gerstel Multipurpose Headspace sampler MPS2. The method developed for the Gerstel Headspace is as follows: 10 minute injection time, 250 rpm agitation speed,  $37^\circ\text{C}$  syringe temperature, 500  $\mu\text{L/s}$  injection speed for a total of 20 minutes cycle time. For the GC/MS instrument the method developed is as follows: 1.00 mL/min column flow, 7.56 psi pressure, Helium gas, run time total of 20 minutes. The column used is Agilent 190091S-433,  $350^\circ\text{C}$  max, HP-5MS 0.25mm x 30.0m x 0.25 $\mu\text{m}$ , capillary 30.0m x 250 $\mu\text{m}$  x 0.25 $\mu\text{m}$  nominal. The ramp was set at  $12^\circ\text{C/minute}$  starting at  $45^\circ\text{C}$  until  $250^\circ\text{C}$ , holding for 1.92 minutes with 0.50 minute solvent delay. Ethyl butyrate was assigned to the signal at  $\sim 3.36$  min, and d-limonene was assigned as  $\sim 6.67$  min. Abundance was determined by peak height. Experimental data are listed in table S1, S2 and S3.

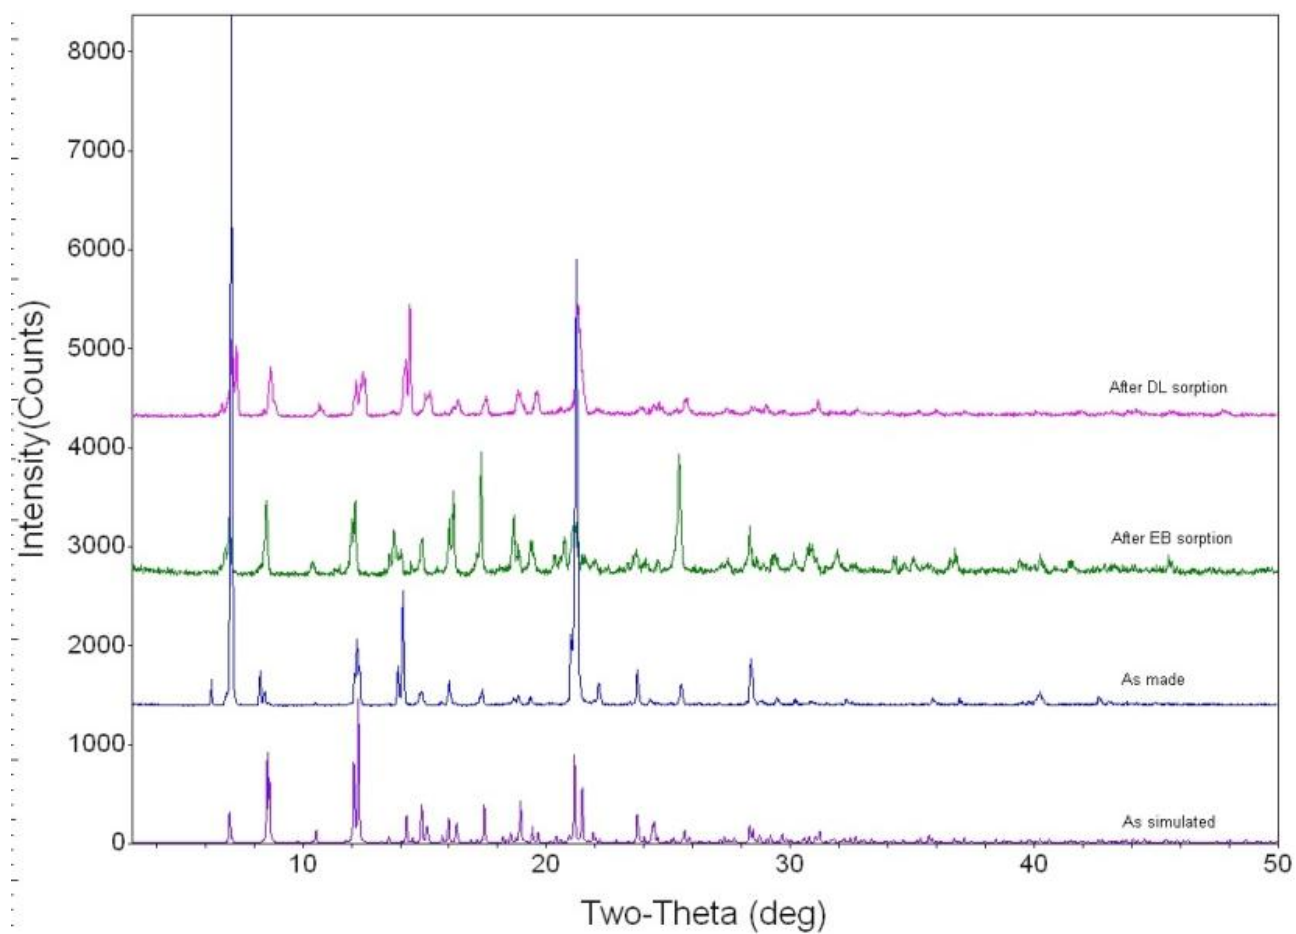

**Figure S1a.** The PXR D patterns of RPM1-Zn before and after adsorption experiments. Color scheme: purple, simulated; blue, as made; green, after EB sorption experiment; pink, after DL sorption experiment.

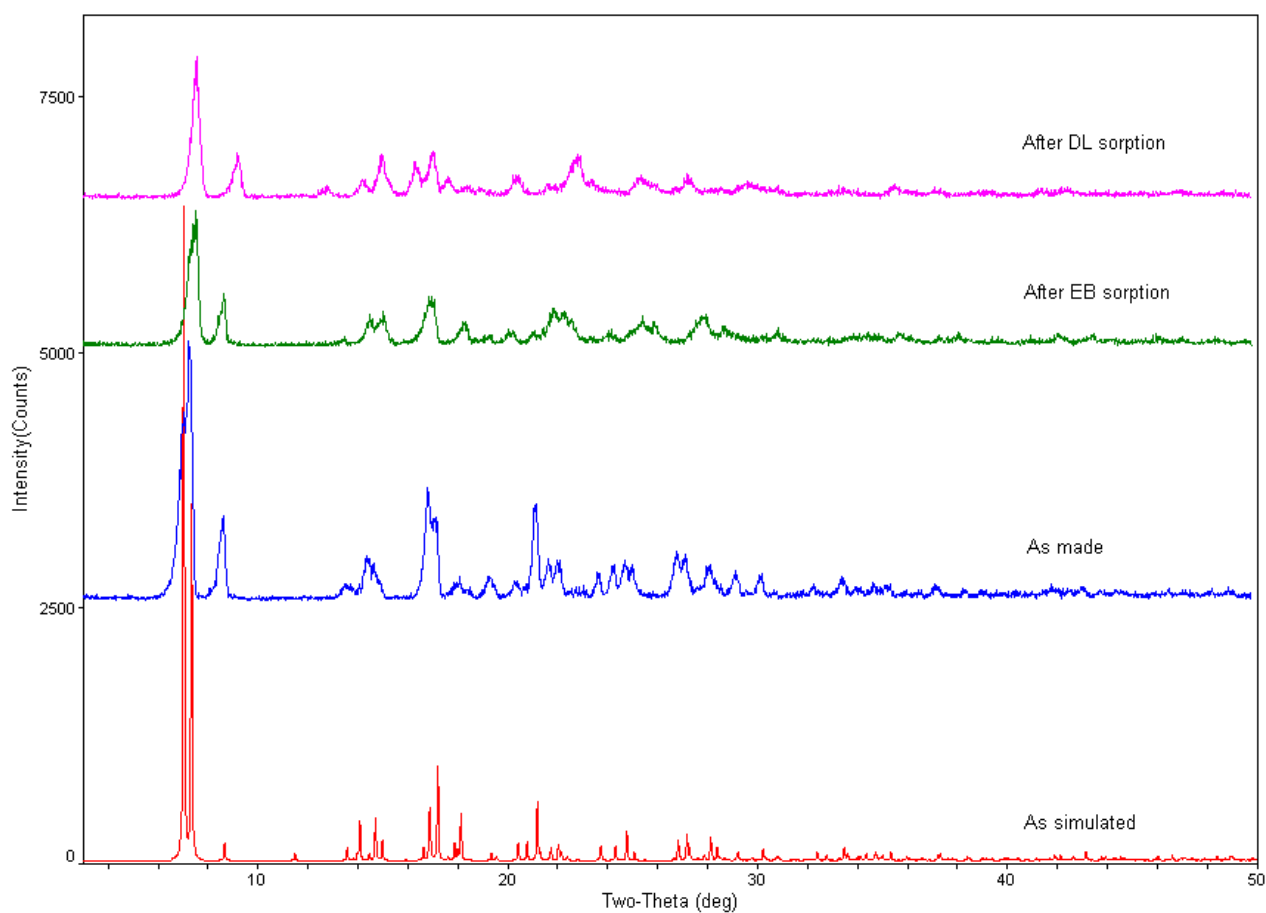

**Figure S1b.** The PXR D patterns of RPM3-Zn before and after adsorption experiments. Color scheme: red, simulated; blue, as made; green, after EB sorption experiment; pink, after DL sorption experiment.

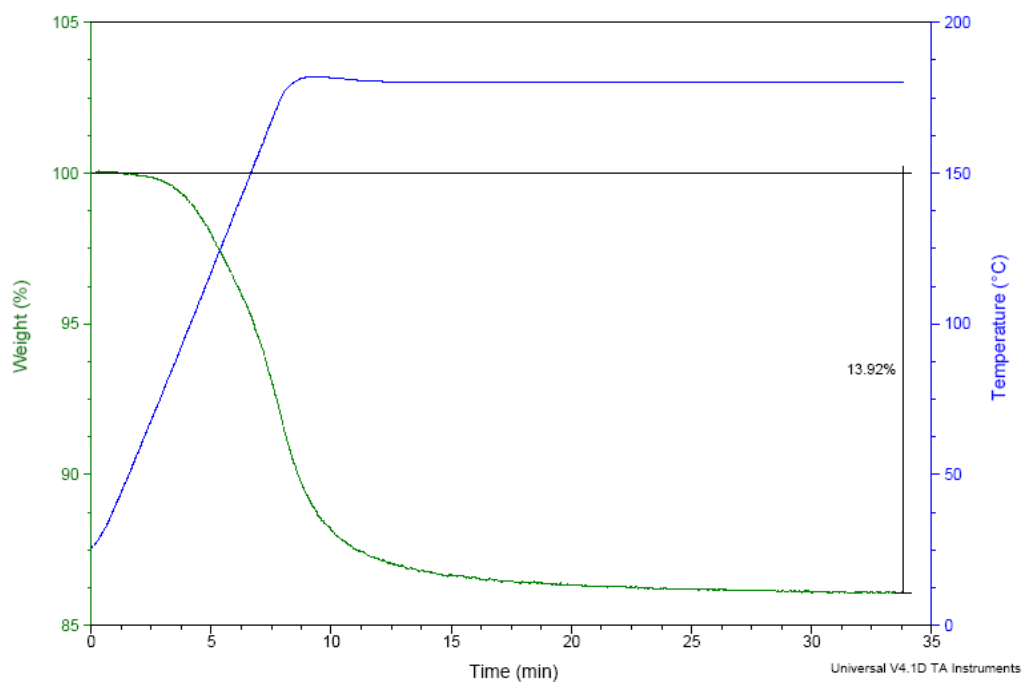

**Figure S2a.** The TG profile of EB desorption from RPM3-Zn.

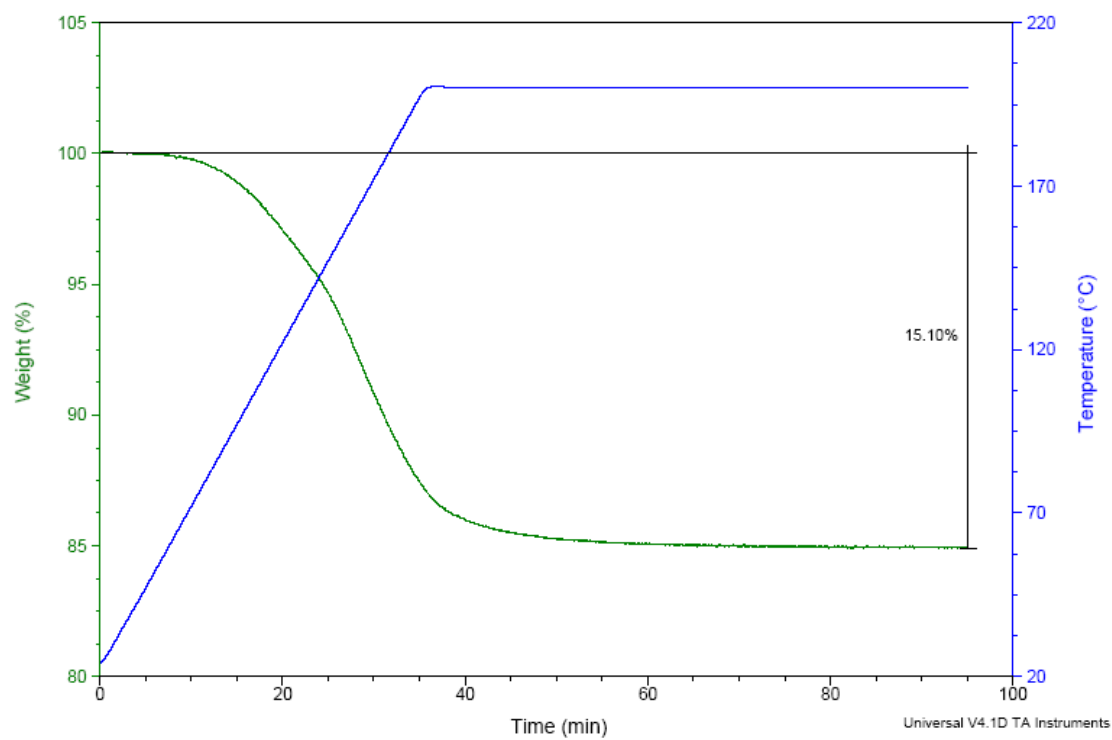

**Figure S2b.** The TG profile of DL desorption from RPM3-Zn.

**Table S1. GC-MS Analysis of D-Limonene**

| Time [Hr] | Peak Height [AU] |
|-----------|------------------|
| 0         | 0                |
| 0.4833    | 3379618          |
| 1.01667   | 3904776          |
| 1.4667    | 3941621          |
| 2.05      | 3947061          |

**Table S2. GC-MS Analysis of RPM-Cap@DL**

| Time [Hr] | Peak Height [AU] |
|-----------|------------------|
| 0         | 1583680          |
| 0.7       | 4696887          |
| 1.3833    | 5312405          |
| 2.1667    | 5073747          |
| 2.6       | 5162841          |
| 3.6833    | 5347841          |
| 4.15      | 5530218          |

**Table S3. GC-MS Analysis of Modified Starch + DL**

| Time [Hr] | Peak Height [AU] |
|-----------|------------------|
| 0         | 4723039          |
| 0.58333   | 5104934          |
| 1.216667  | 4850220          |
| 1.7333    | 4958113          |
| 2.45      | 5137576          |
| 2.9833    | 5214892          |
| 3.7667    | 5133303          |
| 3.98333   | 4938147          |
